# Supplementary material for: Wheat peptides inhibit the activation of MAPK and NF-κB inflammatory pathways and maintain epithelial barrier integrity in NSAID-induced intestinal epithelial injury
Source: Royal Society of Chemistry journal article supplement (doi:10.1039/d3fo03954d), 2023-12-12

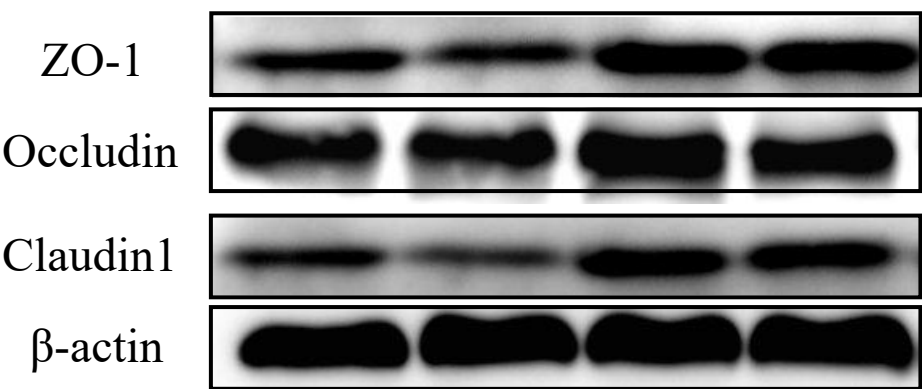

ZO-1/195-230kda

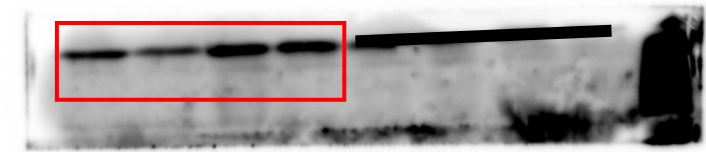

Occludin/59kda

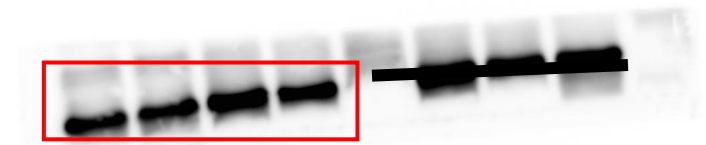

$\beta$ -actin

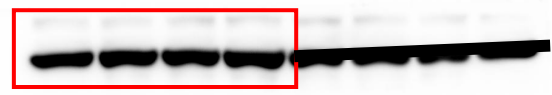

Claudin1/20-23kda

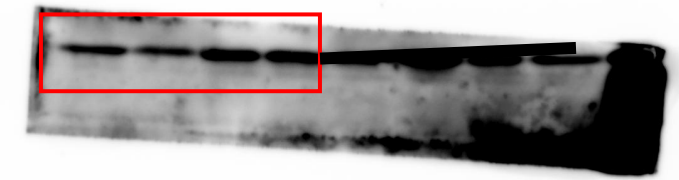

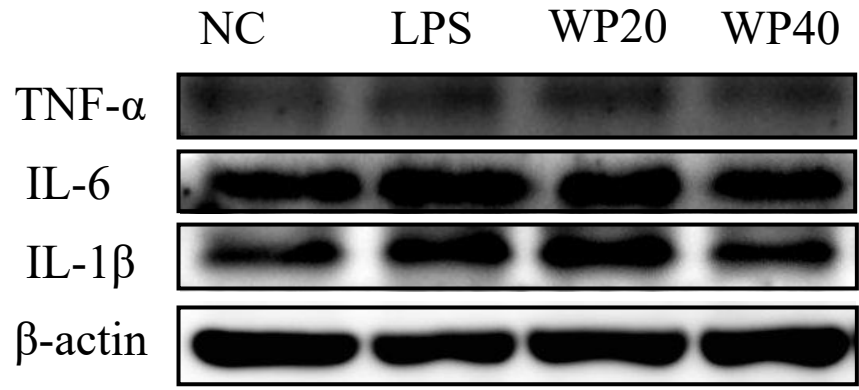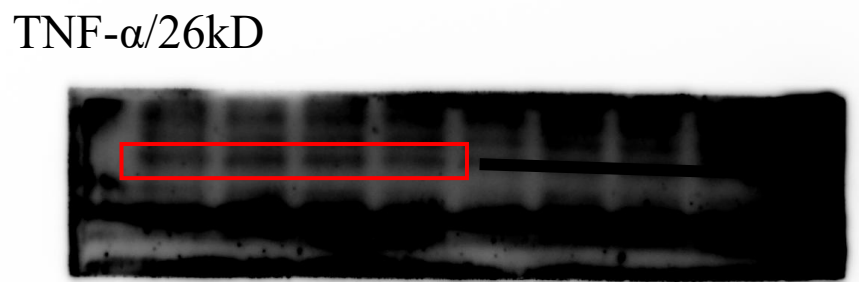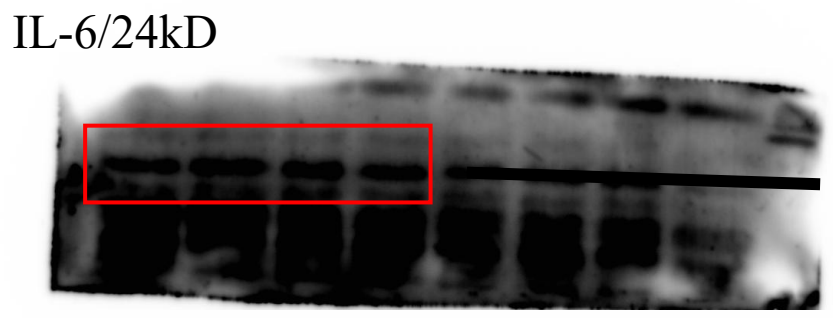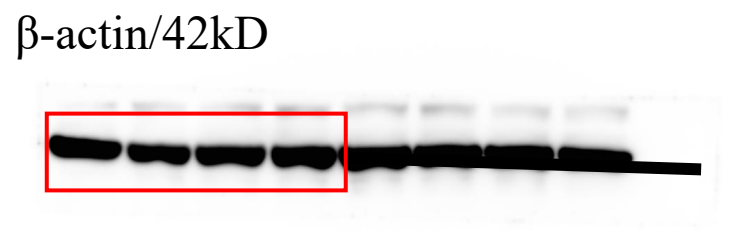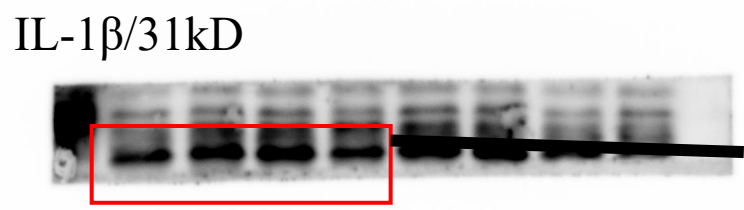

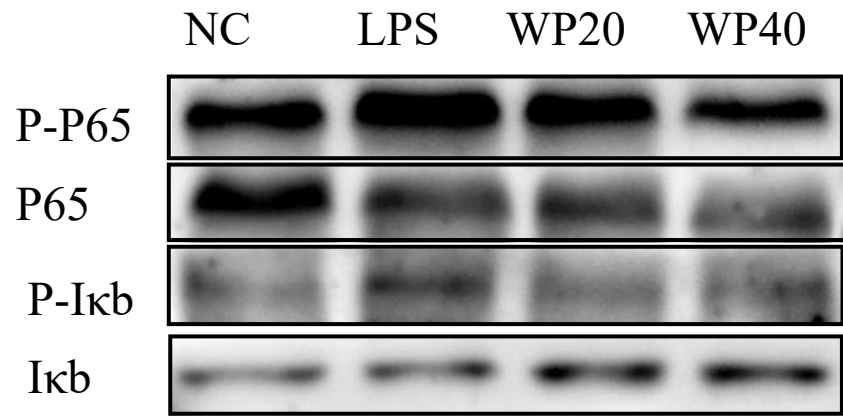

P-P65/65kD

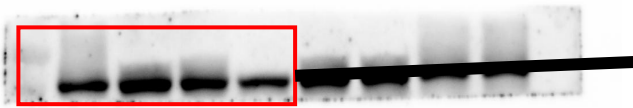

P65/65kD

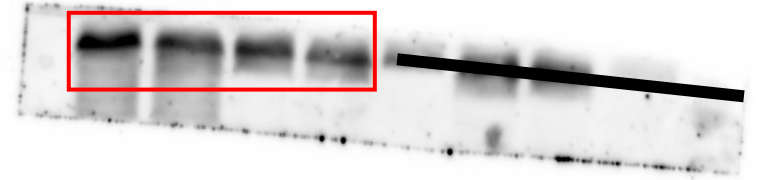

P-Iκb/36kD

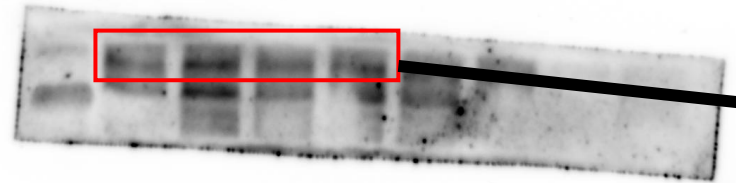

Iκb/36kD

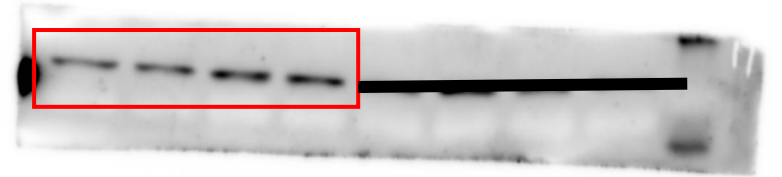

NC LPS WP20 WP40

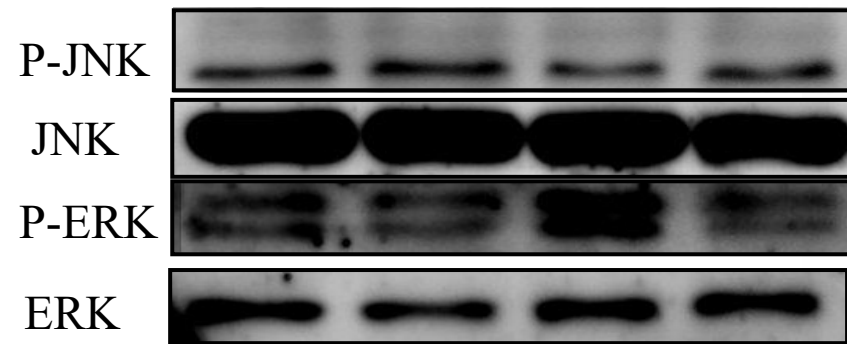

P-JNK/48kD

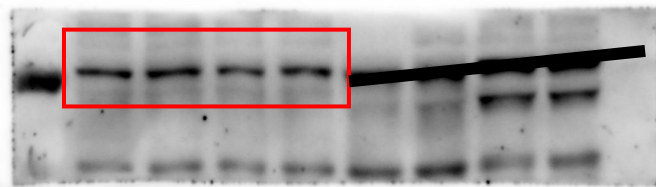

JNK/46kD

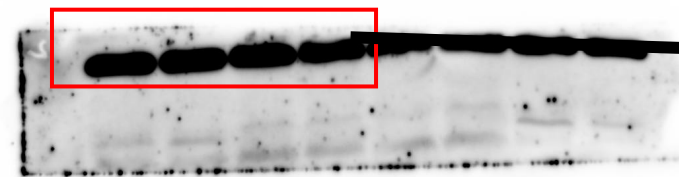

P-ERK/41kD

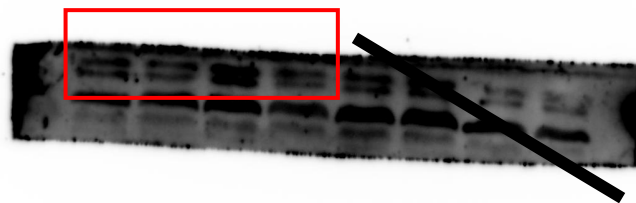

ERK/41kD

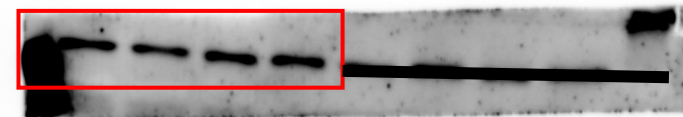

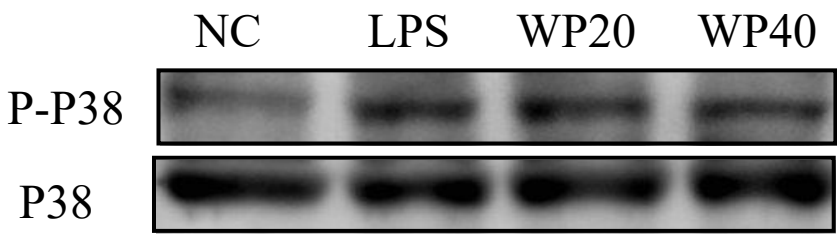

P38/40kD

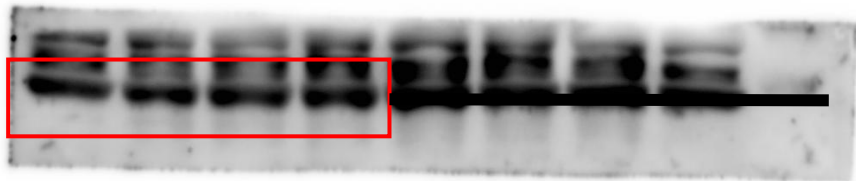

P-P38/40kD

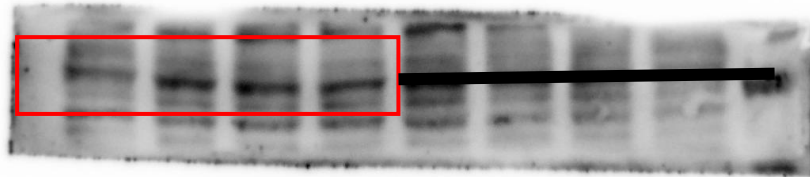

a

NC GLN DIC WP0.3 WP0.6 WP0.9

ZO-1

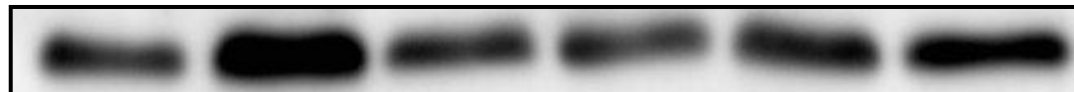

Claudin1

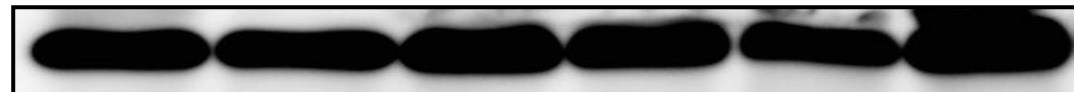

Occludin

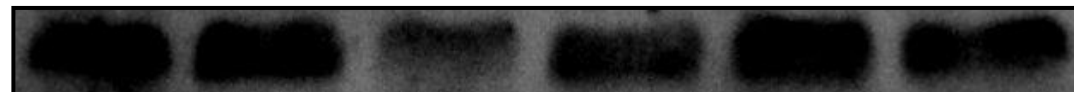

$\beta$ -actin

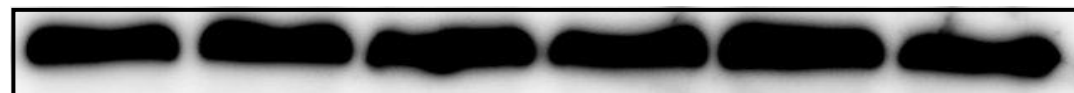

ZO-1/230KD

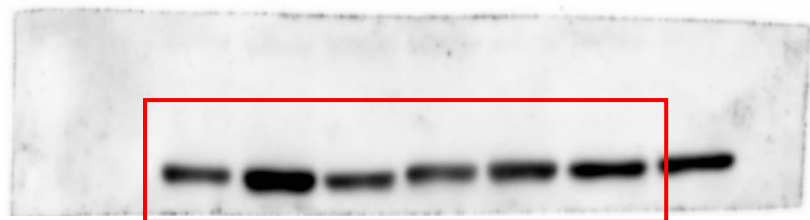

Occludin/59KD

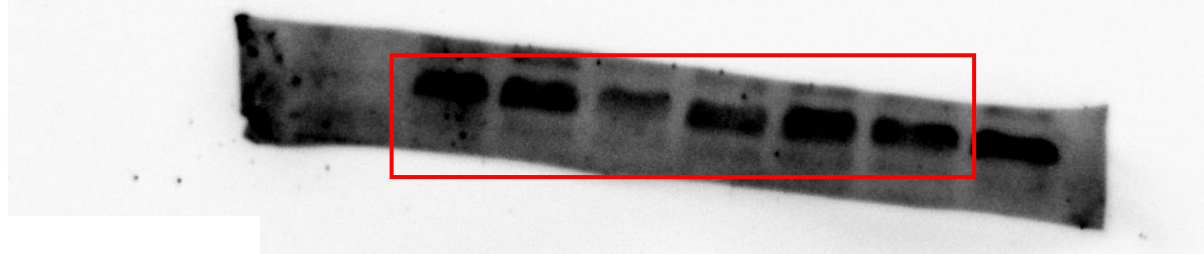

$\beta$ -actin/42KD

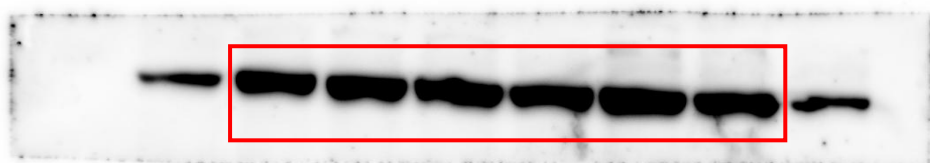

Claudin1/29KD

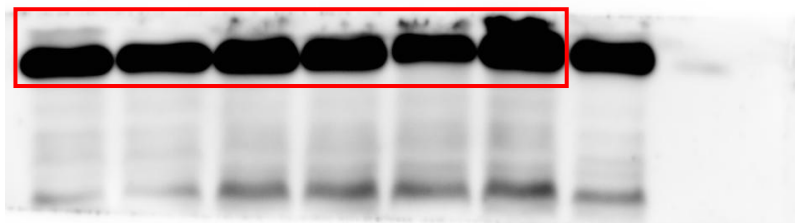

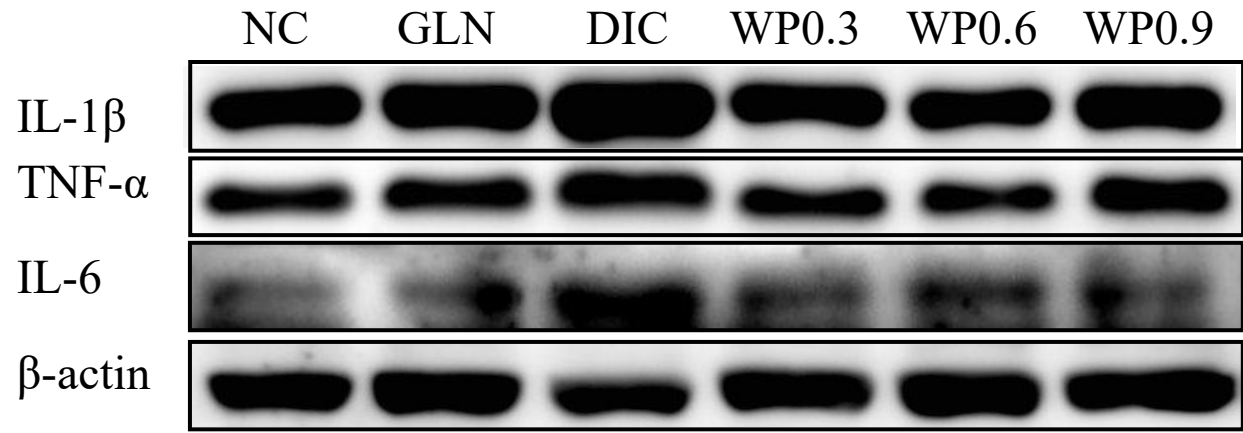

TNF- $\alpha$ /26KD

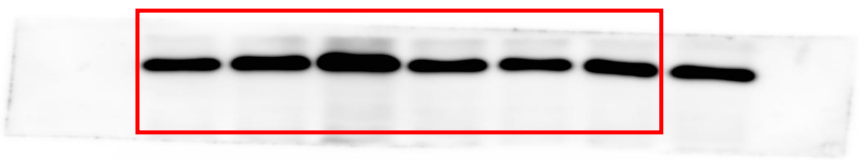

IL-6/24KD

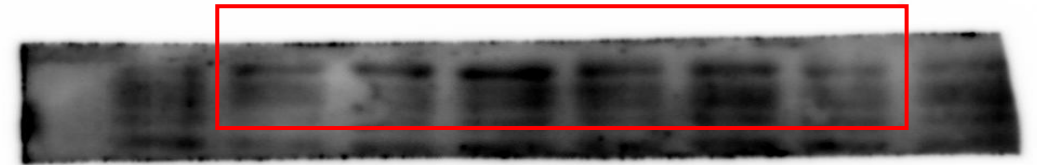

IL-1 $\beta$ /31KD

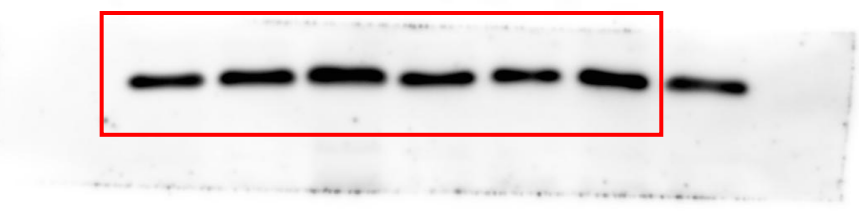

$\beta$ -actin/42KD

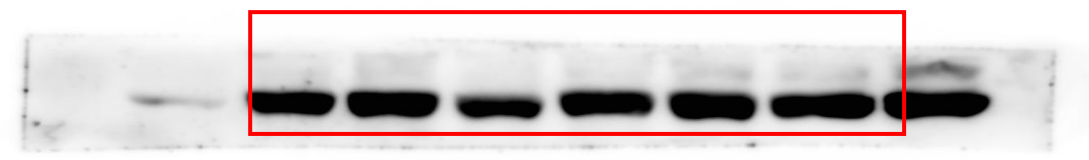

INOS

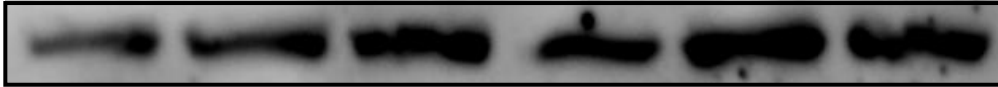

$\beta$ -actin

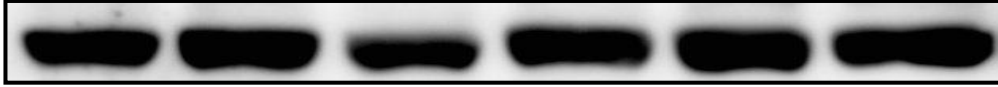

INOS/70KD

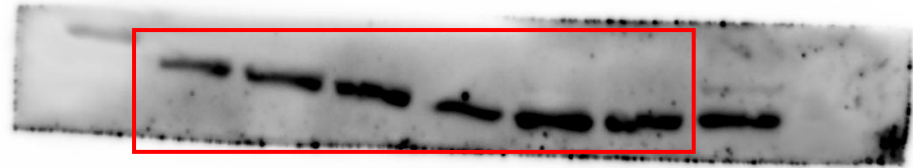

$\beta$ -actin/42KD

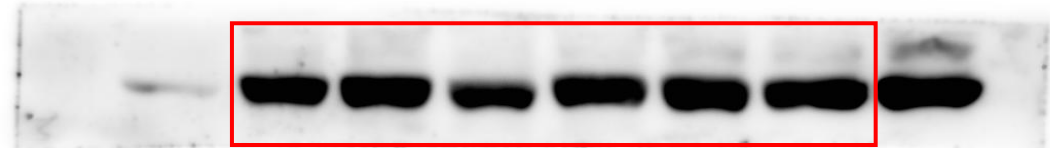

Supplement: d3fo03954d1.pdf [file d3fo03954d1.pdf]
